# Supplementary material for: Response of Carbon Emissions and the Bacterial Community to Freeze–Thaw Cycles in a Permafrost-Affected Forest–Wetland Ecotone in Northeast China
Source: MDPI journal article supplement (doi:10.3390/microorganisms10101950), 2022-09-30
Supplement: s1 [file s1]

**Table S1.** Three-way factorial ANOVA of the effects of FTC amplitude, FTC frequency, patch type, and their interactions on CO<sub>2</sub> and CH<sub>4</sub> emission rates.

|                                        | CO <sub>2</sub> |          | CH <sub>4</sub> |          |
|----------------------------------------|-----------------|----------|-----------------|----------|
|                                        | <i>F</i>        | <i>P</i> | <i>F</i>        | <i>P</i> |
| FTC amplitude                          | 142.336         | <0.001   | 39.462          | <0.001   |
| FTC frequency                          | 122.550         | <0.001   | 79.613          | <0.001   |
| Patch type                             | 173.475         | <0.001   | 271.980         | <0.001   |
| FTC amplitude×FTC frequency            | 14.391          | 0.021    | 8.609           | 0.002    |
| FTC frequency×Patch type               | 14.566          | 0.011    | 17.985          | <0.001   |
| FTC amplitude×Patch type               | 7.272           | 0.560    | 0.012           | 0.012    |
| FTC amplitude×FTC frequency×Patch type | 4.100           | 0.544    | 12.532          | <0.001   |

**Table S2.** Three-way ANOVA for evaluating the effects of FTC amplitude, FTC frequency, patch type, and their interactions on DOC, NH<sub>4</sub><sup>+</sup>-N, and NO<sub>3</sub><sup>-</sup>-N contents.

|                                        | DOC      |          | NH <sub>4</sub> <sup>+</sup> -N |          | NO <sub>3</sub> <sup>-</sup> -N |          |
|----------------------------------------|----------|----------|---------------------------------|----------|---------------------------------|----------|
|                                        | <i>F</i> | <i>P</i> | <i>F</i>                        | <i>P</i> | <i>F</i>                        | <i>P</i> |
| FTC amplitude                          | <0.001   | 0.990    | 0.770                           | 0.389    | 9.199                           | 0.006    |
| FTC frequency                          | 3.776    | 0.038    | 0.103                           | 0.902    | 6.392                           | 0.006    |
| Patch type                             | 11.038   | 0.003    | 1.171                           | 0.290    | 3.797                           | 0.063    |
| FTC amplitude×FTC frequency            | 0.964    | 0.396    | 2.279                           | 0.124    | 3.587                           | 0.043    |
| FTC frequency×Patch type               | 0.430    | 0.656    | 0.233                           | 0.794    | 0.094                           | 0.911    |
| FTC amplitude×Patch type               | 0.319    | 0.577    | <0.001                          | 0.988    | 0.120                           | 0.732    |
| FTC amplitude×FTC frequency×Patch type | 1.060    | 0.362    | 0.287                           | 0.753    | 0.202                           | 0.818    |

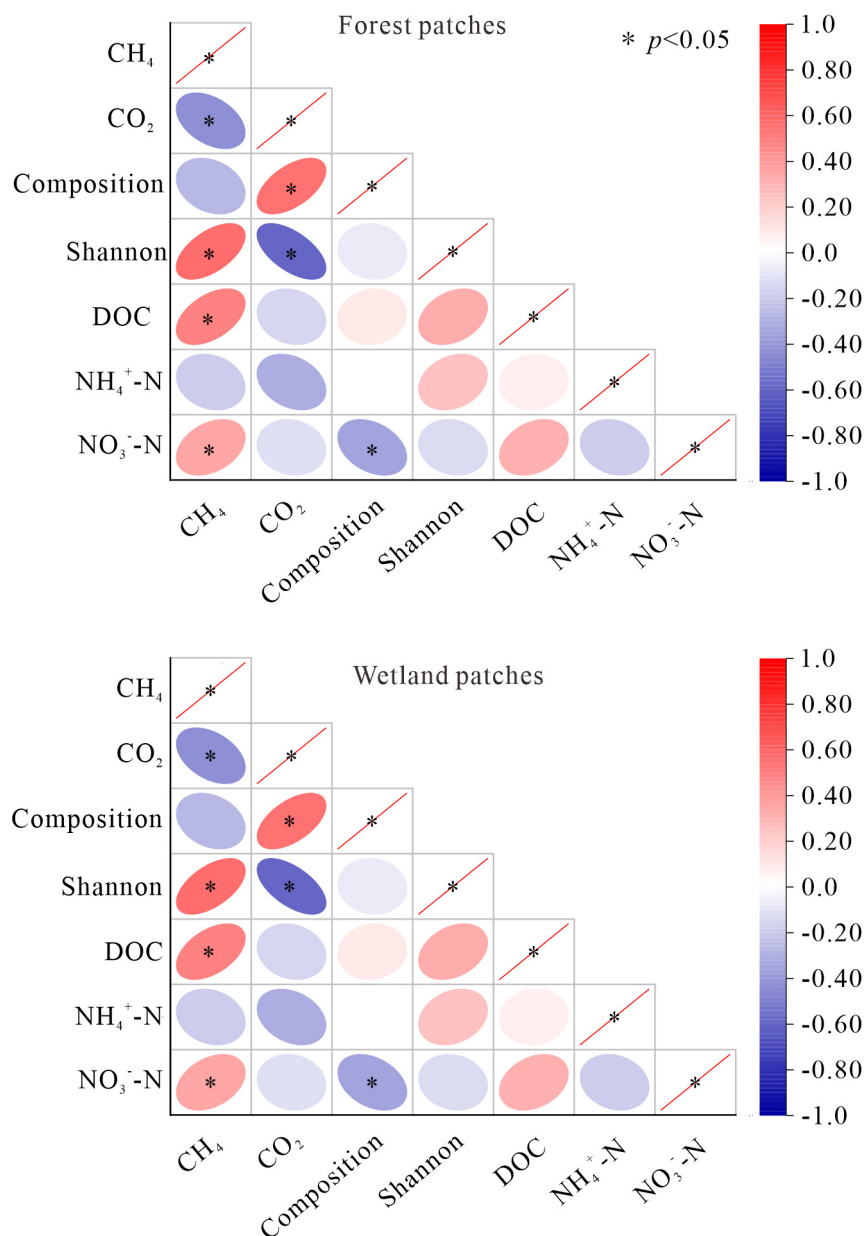

**Figure S1.** Pearson correlations among soil carbon emissions, bacterial diversity, and substrates in forest and wetland patches. Red indicates positive correlations, and blue indicates negative correlations. \* indicated significant correlations at the 0.05 level.
